# Supplementary material
Source: Research Square preprint supplement (doi:10.21203/rs.3.rs-8846876/v1)
Supplement: Supplementary file 1 [file 0e08c26a7d20931f982498a7.docx]

| Supplementary Table 2 Incidence of post-surgical bleeding according to PMI | | | | |
| --- | --- | --- | --- | --- |
|  | Number  of cases | Number of  post-surgical bleeding | Incidence of post-surgical bleeding | *p* value |
| PMI-low | 297 | 25 | 8.4 % | 0.02 |
| PMI-high | 412 | 17 | 4.1 % |  |
| PMI: pectoralis major muscle index | | | | |
