# Supplementary material
Source: Research Square preprint supplement (doi:10.21203/rs.3.rs-8846876/v1)
Supplement: Supplementary file 2 [file 12cf5fb10b089b4e54f69a05.docx]

| Supplementary Table 1 Incidence of post-surgical bleeding according to BMI | | | | |
| --- | --- | --- | --- | --- |
|  | Number  of cases | Number of  post-surgical bleeding | Incidence of post-surgical bleeding | *p* value |
| BMI-low | 453 | 14 | 3.1 % | < 0.0001 |
| BMI-high | 256 | 28 | 10.9 % |  |
| BMI: body mass index | | | | |
