# Supplementary material
Source: Research Square preprint supplement (doi:10.21203/rs.3.rs-8846876/v1)
Supplement: Supplementary file 3 [file caa51a2804ebf659f9a29415.docx]

| Supplementary Table 3 Incidence of post-surgical bleeding according to combination of BMI and PMI | | | | |
| --- | --- | --- | --- | --- |
|  | Number  of cases | Number of  post-surgical bleeding | Incidence of post-surgical bleeding | *p* value |
| BMI-low/PMI-high | 223 | 3 | 1.3 % | < 0.0001 |
| BMI-low/PMI-low | 230 | 11 | 4.8 % |  |
| BMI-high/PM-high | 189 | 14 | 7.4 % |  |
| BMI-high/PMI-low | 67 | 14 | 20.1 % |  |
| BMI: body mass index, PMI: pectoralis major muscle index | | | | |
