# Supplementary material
Source: Research Square preprint supplement (doi:10.21203/rs.3.rs-8846876/v1)
Supplement: Supplementary file 4 [file fbdb28ed934148dc35f2d6e9.docx]

**Supplementary Figure legends**

**Supplementary Figure1.** Flow chart for patient recruitment
